# Supplementary material
Source: Springer Nature journal article supplement (https://www.springermedizin.de/resource/supplementary/12889_2008_1530_MOESM3_ESM.pdf/9503356)
Supplement: MOESM3 [file 9503356]

**Health  
Determinants and  
Status**

**Community  
Engagement**

**Resources  
and  
Services**

**Integration  
and  
Responsiveness**
